# Supplementary material for: Sex-dependent effects of in utero cannabinoid exposure on cortical function
Source: eLife journal article supplement (doi:10.7554/elife.36234), 2018-09-10
Supplement: supp [file elife_poa_e36234_Figure_1_figure_supplement_1_source_data_1.xlsx]

## Sheet: Feuil1
		Supplementary Figure 1A			MALE		FEMALE			Supplementary Figure 1B			MALE		FEMALE
		Tot interaction (#/session)			Isolated	Not Isolated	Isolated	Not Isolated		Tot interaction time (s)			Isolated	Not Isolated	Isolated	Not Isolated
					233	184	237	191					256.02	205.44	292.25	197.9
					163	228	205	203					222.03	254.47	220.24	245.48
					255	242	208	193					285.17	252.13	250.96	228.74
					207	229	217	189					253.17	287.73	247.06	201.19
					224	239	208	165					265	245.48	228.83	219.87
					261	173	197	158					266.22	176.98	220.33	183.58
					231	266	234	174					241.51	256.39	248.97	201.72
					256	200							309.64	195.95
					245	169							230.57	221.49
					283								239.78
		Supplementary Figure 1C			MALE		FEMALE			Supplementary Figure 1D			MALE		FEMALE
		Sniffing (#/session)			Isolated	Not Isolated	Isolated	Not Isolated		Sniffing time(s)			Isolated	Not Isolated	Isolated	Not Isolated
					115	122	107	105					138.37	140.48	119.02	118.94
					153	150	144	139					172.2	175.5	163.91	133.64
					146	94	100	114					184.02	154.05	149.99	160.84
					155	139	132	126					181.17	169.44	181.59	154.35
					114	109	131	121					149.04	180.84	177.5	134.62
					156	132	108	111					192.73	135.25	141.73	112.95
					139	132	152	109					172.08	152.85	178.11	155.71
					162	125							192.01	130.99
					148	123							176.58	153.36
					167								182.86
		Supplementary Figure 1E			MALE		FEMALE			Supplementary Figure 1F			MALE		FEMALE
		Play behavior (#/session)			Isolated	Not Isolated	Isolated	Not Isolated		Attack (#/session)			Isolated	Not Isolated	Isolated	Not Isolated
					37	10	23	5					0	0	0	0
					20	20	28	9					1	0	0	0
					15	29	29	10					0	0	0	0
					18	18	22	10					0	0	0	1
					35	9	23	6					0	0	2	0
					18	7	17	14					0	1	0	0
					20	13	22	27					0	0	0	2
					21	23							1	0
					35	28							0	0
					13								0
