# Supplementary material for: Sex-dependent effects of in utero cannabinoid exposure on cortical function
Source: eLife journal article supplement (doi:10.7554/elife.36234), 2018-09-10
Supplement: supp [file elife_poa_e36234_Figure_1_source_data_1.xlsx]

## Sheet: Feuil1
		Figure 1A			MALE		FEMALE			Figure 1B			MALE		FEMALE
		Tot interaction (#/session)			SHAM	WIN	SHAM	WIN		Tot interaction time (s)			SHAM	WIN	SHAM	WIN
					233	196	237	234					256.02	210.56	292.25	210.24
					163	181	205	231					222.03	203.1	220.24	217.27
					255	184	208	203					285.17	188.06	250.96	237.16
					207	171	217	212					253.17	238.01	247.06	236.15
					224	125	208	203					265	190.56	228.83	246.34
					261	170	197	187					266.22	219.32	220.33	228.83
					231	129	234	228					241.51	183.03	248.97	248.97
					256	150							309.64	190.68
					245								230.57
					283								239.78
		Figure 1C			MALE		FEMALE			Figure 1D			MALE		FEMALE
		Sniffing (#/session)			SHAM	WIN	SHAM	WIN		Sniffing time (s)			SHAM	WIN	SHAM	WIN
					115	121	107	132					138.37	135.58	119.02	164.91
					153	106	144	154					172.2	131.51	163.91	167.09
					146	69	100	137					184.02	98.71	149.99	191.03
					155	132	132	128					181.17	162.36	181.59	169.44
					114	121	131	125					149.04	152.72	177.5	176.37
					156	127	108	158					192.73	153.88	141.73	180.85
					139	98	152	168					172.08	140.75	178.11	183.69
					162	100							192.01	152.57
					148								176.58
					167								182.86
		Figure 1E			MALE		FEMALE			Figure 1F			MALE		FEMALE
		Play behavior (#/session)			SHAM	WIN	SHAM	WIN		Attack (#/session)			SHAM	WIN	SHAM	WIN
					37	18	23	23					0	0	0	0
					20	12	28	24					1	0	0	0
					15	11	29	12					0	0	0	0
					18	26	22	39					0	1	2	1
					35	7	23	20					0	0	0	0
					18	18	17	19					0	0	0	0
					20	2	18	21					0	0	0	0
					21	11							1	0
					35								0
					13								0
