# Supplementary material for: Sex-dependent effects of in utero cannabinoid exposure on cortical function
Source: eLife journal article supplement (doi:10.7554/elife.36234), 2018-09-10
Supplement: supp [file elife_poa_e36234_Figure_2_source_data_1.xlsx]

## Sheet: Feuil1
		Figure 2A			MALE		FEMALE			Figure 2B			MALE		FEMALE
		% Time Open			SHAM	WIN	SHAM	WIN		% Open Entries			SHAM	WIN	SHAM	WIN
					26.3966	39.5971	26.312	22.822					33.3333	35.7143	24.4444	42.8571
					13.6971	27.1478	29.7328	21.5572					20	42.8571	30	20
					27.1682	20.4659	29.9952	34.9927					33.3333	27.2727	21.6667	38.8889
					22.9081	8.19781	20.9314	30.7137					36.3636	16.6667	30	40
					32.5976	14.8186	15.4206	13.6172					33.3333	23.0769	21.6667	47.0588
					20.8318	18.9588	16.6434	17.9821					38.4615	25	22.8571	23.3333
					26.278	23.0944	23.7596	31.6592					42.8571	26.6667	50	33.3333
							25.4242	27.4418							38.0952	50
							14.6481	19.2141							33.3333	30
								26.0496								41.1765
		Figure 2C			MALE		FEMALE			Figure 2D			MALE		FEMALE
		Time open arms (s)			SHAM	WIN	SHAM	WIN		Time close arms (s)			SHAM	WIN	SHAM	WIN
					53.49	82.56	49.1475	31.8121					149.15	125.94	137.64	107.58
					36.811	45.03	68.1	47.04					231.94	120.84	160.94	171.17
					53.41	48.93	53.3106	89.06					143.18	190.15	124.42	165.45
					55.3656	18.6	36.2964	73.2					186.32	208.29	137.11	165.13
					61.73	30.47	26.4	23.5053					127.64	175.15	144.8	149.11
					46.68	34.05	26.2299	26.8182					177.4	145.55	131.37	122.32
					99.2421	59.81	39.8682	65.18					278.42	199.17	127.93	140.7
							56.3672	34.3788							165.34	90.9
							27.4112	23.0824							159.72	97.05
								44.0428								125.03
		Figure 2E			MALE		FEMALE			Figure 2F			MALE		FEMALE
		Discrimination index			VEH	WIN	VEH	WIN		Exploration time (s)			VEH	WIN	VEH	WIN
					0.193509	0.303157	0.31	0.24					75.53	65.94	62.08	70.5
					0.140116	0.224574	0.29	0.29					24	63.59	67.55	48.35
					0.487218	0.274259	0.278	0.33					35.45	26.6	61.73	29.39
					0.732278	0.419629	0.3745	0.31					71.38	30.33	39.94	65.85
					0.232088	0.447619	0.37	0.29					62.43	52.48	32.55	35.34
					0.462049	0.375319	0.24	0.39					22.52	42.16	35.25	45.23
					0.313591	0.316407	0.08	0.43					47.58	45.25	48.86	58.96
								0.26								32.45
		Figure 2G			MALE		FEMALE			Figure 2H			MALE		FEMALE
		Discrimination index			SHAM	WIN	SHAM	WIN		Exploration time (s)			SHAM	WIN	SHAM	WIN
					0.790817	0.451178	0.589036	0.543915					33.6	35.32	46.34	37.23
					0.190283	0.132958	0.335832	0.3379					54.39	52.7	30.42	36.23
					0.775747	0.365154	0.415779	0.348184					30.49	31.87	32.45	39
					0.555613	0.338966	0.265123	0.557965					31.83	36.28	39.43	31.63
					0.324324	0.660714	0.424155	0.310415					39.42	28.23	49.34	51.74
					0.821639	0.453536	0.560202	0.3568					43.35	33.89	35.23	27.15
					0.75996	0.783582	0.355848	0.376008					32.23	42.19	49.21	41.75
					0.424775								42.19
