# Supplementary material for: Sex-dependent effects of in utero cannabinoid exposure on cortical function
Source: eLife journal article supplement (doi:10.7554/elife.36234), 2018-09-10
Supplement: supp [file elife_poa_e36234_Figure_4_figure_supplement_1_source_data_1.xlsx]

## Sheet: Feuil1
							LTD CTRL Male per min						LTD CTRL NESS0327 Male per min						LTD CTRL AMG9810 Male per min
			Supplementary Figure 4A			Time (min)	Mean	SEM	N			Time (min)	Mean	SEM	N			Time (min)	Mean	SEM	N
						-10	99.2677	1.29456	7			-10	99.2034	1.68095	7			-10	100.094	1.28392	7
						-9	99.7666	1.77419	7			-9	99.9614	0.8781	7			-9	100.57	1.34703	7
						-8	97.4666	1.53565	7			-8	98.5888	0.985134	7			-8	99.4313	1.60753	7
						-7	99.1752	1.60426	7			-7	101.057	2.64427	7			-7	99.8422	0.882895	7
						-6	101.543	1.5454	7			-6	98.2849	1.58866	7			-6	101.43	1.94247	7
						-5	100.735	1.41366	7			-5	98.2935	1.14794	7			-5	100.179	0.869676	7
						-4	98.2764	1.1224	7			-4	100.841	1.50419	7			-4	102.787	0.723944	7
						-3	99.8744	1.15289	7			-3	102.099	1.34595	7			-3	98.6985	0.833017	7
						-2	102.358	0.661678	7			-2	100.403	2.08284	7			-2	98.8427	1.84798	7
						-1	101.538	1.4299	7			-1	101.268	2.13553	7			-1	98.1254	2.37792	7
						0	50.5468	3.36862	7			0	71.9976	12.9125	7			0	58.3645	5.53529	7
						1	50.6539	3.03766	7			1	64.2181	5.73421	7			1	50.3396	3.17795	7
						2	50.9797	2.73396	7			2	61.4726	3.72735	7			2	48.8615	3.99158	7
						3	52.8051	2.28697	7			3	60.1578	3.25827	7			3	50.7286	3.71579	7
						4	57.039	2.16456	7			4	61.7303	2.94735	7			4	49.9061	3.57429	7
						5	59.2623	2.30313	7			5	66.661	2.58974	7			5	51.8006	3.8617	7
						6	61.9765	2.71166	7			6	66.9809	2.99049	7			6	53.1359	3.02166	7
						7	62.7217	2.36792	7			7	69.8584	3.2525	7			7	57.0949	3.08653	7
						8	65.5686	3.21879	7			8	70.3368	3.60567	7			8	57.4854	3.19432	7
						9	66.2546	2.89078	7			9	75.0275	3.08791	7			9	57.318	3.35244	7
						10	68.5896	3.57393	7			10	75.1597	3.90755	7			10	60.784	3.44971	7
						11	68.6889	3.50671	7			11	74.5061	4.40081	7			11	62.4767	3.24101	7
						12	70.4052	2.57529	7			12	77.6988	4.43143	7			12	64.3245	3.53677	7
						13	70.7647	3.37933	7			13	78.1644	3.6354	7			13	62.905	3.88394	7
						14	70.1346	3.6402	7			14	79.4714	3.8922	7			14	66.2394	3.3753	7
						15	71.065	3.8071	7			15	79.3389	4.24887	7			15	66.9183	3.51246	7
						16	72.5625	3.3444	7			16	83.5109	4.65239	7			16	66.7517	3.36566	7
						17	75.1671	3.685	7			17	81.4559	4.02821	7			17	69.7076	3.79154	7
						18	74.0321	3.11943	7			18	82.1256	4.93984	7			18	69.8926	4.04915	7
						19	74.5895	4.27728	7			19	81.2886	4.8347	7			19	69.2836	3.56055	7
						20	73.9823	3.45842	7			20	86.8597	5.23743	7			20	70.0242	3.67157	7
						21	75.8271	3.45354	7			21	85.1096	4.75486	7			21	71.5286	4.11391	7
						22	75.7328	4.08519	7			22	82.9844	5.46053	7			22	72.493	3.6716	7
						23	74.3395	5.07876	7			23	84.9373	4.83581	7			23	72.8514	4.52228	7
						24	73.18	4.14053	7			24	86.9171	5.49978	7			24	74.2368	4.0178	7
						25	75.2735	4.09084	7			25	87.6573	5.94059	7			25	74.5309	4.34369	7
						26	76.6863	4.23448	7			26	89.5832	5.82156	7			26	74.7248	4.26734	7
						27	75.6437	4.55814	7			27	87.8964	6.02788	7			27	75.942	4.19937	7
						28	75.3343	3.89797	7			28	88.6705	6.47571	7			28	76.7906	4.25486	7
						29	75.0341	3.83605	7			29	90.3067	7.26009	7			29	78.2851	4.30564	7
						30	74.735	3.61674	7			30	90.0322	8.10642	7			30	76.7898	3.26042	7
						31	75.2661	3.91344	7			31	91.2758	6.50059	7			31	77.1853	4.46118	7
						32	75.0325	3.26832	7			32	90.2628	7.15399	7			32	76.907	4.55439	7
						33	76.4794	3.66154	7			33	91.762	8.14262	7			33	77.3026	4.52827	7
						34	74.5268	3.81793	7			34	90.6419	5.60057	7			34	79.1165	5.29261	7
						35	73.4897	4.41669	7			35	91.2515	6.81152	7			35	79.0033	5.53806	7
						36	72.9885	4.333	7			36	89.6766	7.51629	7			36	78.4013	4.95814	7
						37	73.9603	4.15752	7			37	94.24	6.12059	7			37	77.6637	4.63096	7
						38	73.5569	3.65353	7			38	93.0197	8.48226	7			38	80.7187	5.74192	7
						39	74.7772	3.78827	7			39	95.483	8.29318	7			39	81.3088	5.65791	7
						40	74.026	3.29496	7			40	94.2891	8.62299	7			40	78.477	4.63205	7
							Pre-Post LTD CTRL Male						Pre-Post LTD NESS0327 Male						Pre-Post LTD AMG9810 Male
							Mean	SEM	N				Mean	SEM	N				Mean	SEM	N
			Supplementary Figure 4B			Baseline	0.239457	0.019359	7			Baseline	0.222543	0.0152898	7			Baseline	0.2584	0.0242629	7
						LTD	0.174829	0.01457	7			LTD	0.2083	0.0237707	7			LTD	0.204257	0.0244838	7
							LTD CTRL Female per min						LTD CTRL Female per min						LTD CTRL Female per min
			Supplementary Figure 4C			Time (min)	Mean	SEM	N			Time (min)	Mean	SEM	N			Time (min)	Mean	SEM	N
						-10	97.9241	0.694522	5			-10	99.1765	0.950486	8			-10	98.2075	2.33852	6
						-9	98.3692	2.08572	5			-9	99.8975	1.30976	8			-9	97.7805	1.23348	6
						-8	99.3221	2.3521	5			-8	101.323	1.06917	8			-8	97.1641	1.37685	6
						-7	99.9658	1.21984	5			-7	100.979	1.14333	8			-7	98.8634	2.19391	6
						-6	98.5207	1.03465	5			-6	96.9707	0.818642	8			-6	100.334	0.984647	6
						-5	100.302	1.02346	5			-5	101.207	0.328715	8			-5	98.733	1.24143	6
						-4	100.642	0.785816	5			-4	100.486	1.25199	8			-4	103.575	1.28982	6
						-3	100.102	1.23359	5			-3	99.5054	1.77685	8			-3	102.55	1.07191	6
						-2	101.546	1.02132	5			-2	99.2555	0.985214	8			-2	100.871	1.70921	6
						-1	103.307	2.58401	5			-1	101.2	1.64462	8			-1	101.922	1.71313	6
						0	64.8506	9.99745	5			0	56.6004	2.85824	8			0	60.0092	8.47311	6
						1	54.355	4.40488	5			1	54.3184	1.71887	8			1	57.2918	6.02589	6
						2	51.8582	4.20245	5			2	53.6293	3.06109	8			2	57.4604	6.62082	6
						3	54.442	5.46978	5			3	53.9349	3.71628	8			3	59.7691	7.68512	6
						4	53.9738	4.35917	5			4	56.9453	3.65044	8			4	57.6037	5.51096	6
						5	57.6679	5.50888	5			5	58.9462	2.37358	8			5	61.5483	6.17143	6
						6	60.6436	4.71524	5			6	60.3411	3.20002	8			6	63.4972	6.07475	6
						7	60.0478	4.37076	5			7	61.7852	2.92786	8			7	66.9816	6.54865	6
						8	60.8456	5.72737	5			8	64.0721	3.4345	8			8	71.5808	4.74249	6
						9	60.5903	5.012	5			9	66.6833	3.64477	8			9	71.8705	5.15277	6
						10	63.4032	5.27901	5			10	67.7681	3.79551	8			10	71.5268	3.95459	6
						11	66.7448	5.54677	5			11	68.9569	4.03435	8			11	74.2234	4.10318	6
						12	64.2785	4.38105	5			12	68.2835	4.21065	8			12	75.8513	4.78242	6
						13	66.4661	5.61966	5			13	70.0719	3.89484	8			13	80.8555	5.0554	6
						14	67.8041	6.12145	5			14	72.6613	4.5727	8			14	82.2099	4.88638	6
						15	70.2707	5.79554	5			15	73.8227	4.71804	8			15	80.2672	3.94168	6
						16	70.7085	6.61747	5			16	73.8261	4.49231	8			16	81.7133	5.63616	6
						17	71.6021	7.00038	5			17	75.3978	5.22996	8			17	83.4704	5.03155	6
						18	70.2595	6.09379	5			18	74.7699	5.30524	8			18	81.8955	4.85474	6
						19	69.507	6.00677	5			19	74.114	5.97768	8			19	84.883	4.1675	6
						20	69.9191	6.54559	5			20	74.6808	6.15534	8			20	83.1159	4.86393	6
						21	71.5215	6.23682	5			21	75.5352	5.31757	8			21	85.3166	4.21544	6
						22	74.6591	6.94562	5			22	76.4102	5.60437	8			22	87.3792	6.41071	6
						23	74.6107	6.46473	5			23	77.4005	5.59683	8			23	87.4706	4.9242	6
						24	75.5447	8.14762	5			24	74.1686	4.59618	8			24	88.0944	4.92956	6
						25	75.285	7.54576	5			25	77.2184	5.6741	8			25	89.1878	5.39819	6
						26	75.0904	7.07139	5			26	78.5523	5.88413	8			26	88.5715	6.09887	6
						27	73.6246	7.12529	5			27	77.5195	6.14269	8			27	89.9571	6.45438	6
						28	73.3801	7.60017	5			28	78.4057	6.16634	8			28	91.2043	5.32525	6
						29	75.3439	7.34103	5			29	79.0448	6.28197	8			29	95.2277	6.7961	6
						30	74.7047	7.35448	5			30	78.6323	6.19423	8			30	96.5552	6.0375	6
						31	77.0347	7.73126	5			31	79.6153	6.45263	8			31	93.1577	4.93554	6
						32	74.3287	6.41304	5			32	79.9125	5.68835	8			32	97.1029	5.19341	6
						33	75.9978	7.17102	5			33	77.2985	6.69107	8			33	95.5287	6.7875	6
						34	73.4014	7.26885	5			34	79.4483	6.56438	8			34	95.0338	5.23267	6
						35	75.0325	6.84267	5			35	80.9343	6.62956	8			35	94.9602	6.47153	6
						36	76.7883	6.11285	5			36	80.9568	6.70176	8			36	96.9356	6.3733	6
						37	75.3637	5.71058	5			37	81.8413	6.03669	8			37	94.3229	5.80702	6
						38	74.5344	6.42784	5			38	80.966	6.63111	8			38	95.8457	6.69552	6
						39	76.7511	6.85557	5			39	81.7193	6.71782	8			39	96.5661	6.10095	6
						40	77.0866	6.61644	5			40	80.9138	6.3724	8			40	95.658	5.96556	6
							Pre-Post LTD CTRL Female						Pre-Post LTD NESS0327 Female						Pre-Post LTD AMG9810 Female
							Mean	SEM	N				Mean	SEM	N				Mean	SEM	N
			Supplementary Figure 4B			Baseline	0.25394	0.0343287	5			Baseline	0.2035	0.0133381	8			Baseline	0.21605	0.0155466	6
						LTD	0.19094	0.0306807	5			LTD	0.161525	0.0114064	8			LTD	0.203733	0.0117611	6
