# Supplementary material for: Sex-dependent effects of in utero cannabinoid exposure on cortical function
Source: eLife journal article supplement (doi:10.7554/elife.36234), 2018-09-10
Supplement: supp [file elife_poa_e36234_Figure_4_source_data_1.xlsx]

## Sheet: Feuil1
						LTD SHAM Male per min						LTD WIN Male per min
			Figure 4A		Time (min)	Mean	SEM	N			Time (min)	Mean	SEM	N
					-10	99.3958	1.56449	7			-10	101.259	0.411975	17
					-9	100.912	0.433268	7			-9	99.5466	0.712632	17
					-8	98.4508	0.830959	7			-8	99.6999	0.656627	17
					-7	100.562	0.739484	7			-7	98.9998	0.848911	17
					-6	100.008	0.56191	7			-6	98.4611	0.571876	17
					-5	99.7611	0.966453	7			-5	100.733	0.59009	17
					-4	99.676	1.68109	7			-4	99.6319	0.771891	17
					-3	101.766	0.595471	7			-3	98.5203	0.990341	17
					-2	99.9701	0.701199	7			-2	101.601	0.492214	17
					-1	99.4979	0.698713	7			-1	101.548	0.633492	17
					0	61.3903	6.59864	7			0	63.425	4.80765	17
					1	62.1628	6.28755	7			1	65.4383	4.47755	17
					2	58.3826	5.58441	7			2	63.5533	4.16804	17
					3	59.7773	5.2783	7			3	63.7067	4.22378	17
					4	62.6865	4.9587	7			4	64.5849	4.28246	17
					5	64.5553	4.83455	7			5	68.2091	4.15746	17
					6	66.4887	4.67783	7			6	70.7307	4.10991	17
					7	69.1666	4.58733	7			7	72.6569	3.70585	17
					8	71.2987	4.11152	7			8	75.1757	3.74433	17
					9	73.2052	4.06358	7			9	78.7224	3.57958	17
					10	74.3347	4.1207	7			10	80.2048	3.77086	17
					11	74.8714	3.36994	7			11	82.0743	3.34108	17
					12	75.634	3.4692	7			12	83.3742	3.207	17
					13	78.3895	3.68699	7			13	84.0188	2.92576	17
					14	77.1498	3.11787	7			14	84.5008	2.75898	17
					15	76.6502	3.04225	7			15	85.1383	2.72316	17
					16	79.3733	3.74804	7			16	87.6888	2.78036	17
					17	80.0671	3.01105	7			17	87.4561	2.50092	17
					18	78.5689	2.95192	7			18	87.2203	2.66341	17
					19	79.316	2.97801	7			19	89.4516	2.95905	17
					20	79.2028	2.75873	7			20	91.4955	2.94605	17
					21	80.0806	3.05807	7			21	89.8989	3.02749	17
					22	81.7377	2.82968	7			22	91.5005	2.55274	17
					23	81.5492	2.70836	7			23	93.2406	3.09925	17
					24	82.8332	2.73824	7			24	92.8042	2.61938	17
					25	81.5244	2.83701	7			25	92.8164	2.5447	17
					26	81.5404	3.37369	7			26	93.6893	2.46584	17
					27	82.0079	2.90692	7			27	95.2156	2.49144	17
					28	82.4115	3.31741	7			28	93.0768	2.85163	17
					29	82.0061	2.67607	7			29	94.2747	2.63464	17
					30	81.9914	3.70988	7			30	94.2294	2.54276	17
					31	80.1758	3.46093	7			31	94.3899	2.77652	17
					32	81.5359	3.85378	7			32	96.3055	2.5796	17
					33	81.8441	4.4904	7			33	93.865	2.9933	17
					34	80.879	5.15435	7			34	93.9618	2.61957	17
					35	81.5263	4.81151	7			35	95.9053	2.74013	17
					36	80.8258	5.12152	7			36	96.6874	3.0365	17
					37	81.029	5.93373	7			37	96.0199	2.81086	17
					38	81.3158	5.64725	7			38	96.0692	2.76409	17
					39	82.3171	4.79055	7			39	97.1338	2.76287	17
					40	81.2497	3.96456	7			40	96.7836	3.09503	17
						Pre-Post LTD SHAM Male						Pre-Post LTD WIN Male
						Mean	SEM	N				Mean	SEM	N
			Figure 4B		Baseline	0.184929	0.00612251	7			Baseline	0.1981	0.00818228	17
					LTD	0.149771	0.00739381	7			LTD	0.188431	0.00983435	17
						LTD SHAM Female per min						LTD WIN Female per min
			Figure 4C		Time (min)	Mean	SEM	N			Time (min)	Mean	SEM	N
					-10	98.7364	1.51852	5			-10	99.0032	0.8183	13
					-9	97.067	1.16165	5			-9	99.8594	0.497899	13
					-8	98.4184	0.990149	5			-8	100.591	0.598105	13
					-7	99.4169	2.03073	5			-7	99.4798	0.617652	13
					-6	99.2976	0.982263	5			-6	99.2231	0.430465	13
					-5	100.192	1.31689	5			-5	100.07	0.513641	13
					-4	100.663	1.29397	5			-4	100.127	0.866385	13
					-3	103.024	1.2023	5			-3	100.27	0.739026	13
					-2	100.835	1.14281	5			-2	101.107	0.57469	13
					-1	101.663	1.15558	4			-1	100.269	0.539797	13
					0	52.8263	1.97676	5			0	44.5341	2.11314	13
					1	57.3696	4.60413	5			1	50.883	2.43605	13
					2	59.9998	2.73619	5			2	51.9747	1.80882	13
					3	60.1401	2.67122	5			3	53.4817	2.09014	13
					4	64.1137	2.39089	5			4	55.8161	1.95527	13
					5	67.6533	2.04319	5			5	58.9902	1.97264	13
					6	70.0976	2.71278	5			6	62.3178	1.99422	13
					7	72.3131	2.07861	5			7	65.6189	2.30619	12
					8	75.3263	2.07896	5			8	67.743	2.20246	12
					9	76.6761	2.25345	5			9	69.0979	2.10619	13
					10	79.9114	3.30395	5			10	70.2737	2.29677	13
					11	77.2026	2.48425	5			11	72.5719	2.05043	13
					12	79.3134	2.90675	5			12	72.2943	2.20339	13
					13	77.8158	3.28107	5			13	74.7496	2.11749	13
					14	81.1104	1.61628	5			14	75.5545	2.074	13
					15	82.3909	1.85095	5			15	77.4624	1.91202	13
					16	82.3808	2.18428	5			16	78.1636	2.1232	13
					17	84.6327	2.76971	5			17	78.6486	1.85804	13
					18	84.5145	2.72672	5			18	79.9878	1.91695	13
					19	87.1249	2.99737	5			19	80.407	2.30986	13
					20	83.2129	3.10552	5			20	80.1227	1.90089	13
					21	84.2267	1.18191	5			21	80.8962	1.75918	13
					22	85.4547	2.90004	5			22	81.5115	1.65579	13
					23	86.3238	2.52773	5			23	81.784	1.8667	13
					24	87.2739	2.17447	5			24	81.8824	2.20582	13
					25	88.882	3.04659	5			25	82.0075	1.91477	13
					26	86.1823	4.29742	5			26	82.8583	1.71203	13
					27	89.1786	3.29168	5			27	82.7357	1.79857	13
					28	91.2874	3.11078	5			28	83.6612	1.92429	13
					29	88.0533	2.68018	5			29	83.4454	1.81695	13
					30	88.7073	3.2814	5			30	84.0645	1.585	13
					31	89.2874	3.9975	5			31	84.3122	2.08653	13
					32	88.3412	3.377	5			32	83.3696	2.43399	13
					33	86.7689	4.08588	5			33	82.9852	2.92363	13
					34	87.228	2.77932	5			34	83.2123	2.63312	13
					35	91.0221	3.61376	5			35	84.3591	2.43812	12
					36	90.7625	3.53173	5			36	84.098	2.46355	12
					37	88.0935	3.10385	5			37	82.6105	2.90925	13
					38	86.2085	3.44645	5			38	84.1699	3.12483	13
					39	87.2314	3.37615	5			39	84.2698	3.27991	13
					40	87.9979	4.16533	5			40	84.1788	3.20278	13
						Pre-Post LTD SHAM Female						Pre-Post LTD WIN Female
						Mean	SEM	N				Mean	SEM	N
			Figure 4D		Baseline	0.2039	0.00866274	5			Baseline	0.255277	0.011645	13
					LTD	0.16802	0.00956569	5			LTD	0.213831	0.0125894	13
