# Supplementary material for: Sex-dependent effects of in utero cannabinoid exposure on cortical function
Source: eLife journal article supplement (doi:10.7554/elife.36234), 2018-09-10
Supplement: supp [file elife_poa_e36234_Figure_8_source_data_1.xlsx]

## Sheet: Sheet1
Gene	Type	Sample #1	Sample #1	Sample #2	Sample #2	Sample #3	Sample #3	Sample #4	Sample #4	Sample #5	Sample #5	Sample #6	Sample #6	Sample #7	Sample #7	Sample #8	Sample #8
CB1	NT-Males	27.2141	27.4037	27.5306	27.4766	27.8715	28.0461	27.9075	27.6958	27.2631	27.3607	27.2673	27.1754	26.8039	26.7705	26.8662	26.9674
	NT-Females	28.287	28.049	29.08	27.915	27.914	28.4	27.967	29.214	27.822	27.981	27.0334	27.1173	27.3065	27.3785	26.8237	26.667
	WIN-Males	26.9871	27.3015	27.365	27.2192	27.3962	27.4618	27.5762	27.6542	27.9063	27.9684	27.1675	27.1227	26.8277	26.736	27.0347	27.1322
	WIN-Females	27.217	27.559	27.519	27.742	27.311	27.206	27.677	27.365	27.453	27.26	28.8329	28.8783	26.7423	26.6927	26.6357	26.7664
GAPDH (CB1)	NT-Males	18.2984	18.5062	18.1855	18.34	18.6138	18.7143	18.6424	18.6947	18.2709	18.459	18.2744	18.3417	17.9891	18.0685	18.1544	18.2061
	NT-Females	19.415	18.676	20.049	18.662	18.705	19.503	18.695	20.128	18.682	18.69	18.2161	18.3354	18.8487	18.7429	18.2897	18.1038
	WIN-Males	18.1354	18.2357	18.0617	18.1518	18.0043	18.0953	18.4229	18.2498	18.5821	18.4666	18.2714	18.2869	18.0299	18.1241	18.1094	18.2769
	WIN-Females	18.679	18.698	18.403	18.576	18.252	18.603	18.681	18.396	18.388	18.371	19.751	19.6981	18.0795	18.1034	18.2891	18.1537
CB2	NT-Males	33.5115	33.1578	33.1624	33.6147	32.5064	32.7173	33.2108	33.1702	33.2871	32.992	33.0062	ND	33.4085	33.5802	x	x
	NT-Females	33.6647	33.8091	33.1053	33.3	33.0693	33.4042	33.0895	33.4111	33.0554	32.9062	33.4344	33.1826	33.3305	33.488	x	x
	WIN-Males	33.223	33.3573	33.5804	33.3605	33.6589	33.16	33.3603	33.3951	32.4262	32.5172	33.113	33.3325	33.3135	32.8923	x	x
	WIN-Females	34.0135	33.7014	33.4556	33.5122	33.3162	33.3644	33.9341	33.7533	33.4136	33.2138	33.3324	33.5014	32.8516	32.869	x	x
GAPDH (CB2)	NT-Males	18.0203	17.9612	18.1698	18.1871	17.8912	17.8311	17.7645	17.7625	17.459	17.6783	17.9013	17.8524	17.8576	17.947	x	x
	NT-Females	18.3075	18.3507	17.9868	17.9674	19.1379	19.005	17.3971	17.38	17.7039	17.6307	18.3389	18.3385	17.7437	17.8727	x	x
	WIN-Males	17.857	17.7239	17.9995	17.6859	17.6012	17.6786	18.0857	18.1746	17.7368	17.814	17.9483	17.782	18.142	17.9974	x	x
	WIN-Females	17.9427	17.7175	18.0954	18.0718	17.6186	17.5208	17.6677	17.5282	17.2076	17.2117	17.6055	17.585	17.886	17.8207	x	x
DAGL-A	NT-Males	25.8233	25.9479	26.067	25.9191	26.1557	26.1271	26.2327	26.2869	25.8868	26.1251	26.597	26.4768	26.1925	26.115	26.205	26.1787
	NT-Females	27.45	26.649	27.508	26.81	26.733	27.551	26.862	27.611	26.833	27.093	26.17	26.2028	26.3973	26.6131	25.7763	25.77
	WIN-Males	25.9744	25.9184	26.2746	26.0041	26.0582	25.8433	26.2248	26.2832	26.0125	26.3612	26.5037	26.4308	26.2408	26.2385	26.2418	26.294
	WIN-Females	26.812	26.813	26.65	26.861	26.397	26.983	26.841	26.861	26.919	26.42	28.1179	28.0037	26.258	26.2788	25.9979	26.0249
GAPDH (DAGL-A)	NT-Males	18.1854	18.6847	18.3237	18.3456	18.3744	18.5284	18.3851	18.3898	ND	18.0337	18.2744	18.3417	17.8884	17.7296	17.5794	17.8576
	NT-Females	19.415	18.676	20.049	18.662	18.705	19.503	18.695	20.128	18.682	18.69	18.2161	18.3354	18.535	18.5193	17.8374	17.8901
	WIN-Males	18.5198	18.057	17.7878	17.8081	17.6236	17.6696	18.2342	18.2948	18.1823	18.3714	18.2714	18.2869	17.9805	18.0642	17.9963	18.0852
	WIN-Females	18.679	18.698	18.403	18.576	18.252	18.603	18.681	18.396	18.388	18.371	19.751	19.6981	18.165	18.2506	18.0469	17.9417
DAGL-B	NT-Males	26.6343	26.604	27.1819	26.9946	26.7889	26.7995	26.9537	26.9776	26.9889	27.2386	26.9731	26.9922	26.5413	26.58	x	x
	NT-Females	27.4462	27.5986	27.5287	27.4061	28.814	28.7257	26.9091	26.8819	27.7973	28.0848	27.7086	27.7518	26.9602	26.8999	x	x
	WIN-Males	27.4504	27.1064	26.9013	26.8118	27.1496	27.0243	27.2133	27.2699	26.9404	27.1147	27.025	27.1047	26.8902	27.0383	x	x
	WIN-Females	27.329	27.0716	26.7751	26.8545	27.6778	27.439	27.3974	27.3609	27.1259	27.0149	27.1283	27.0554	26.9413	27.2636	x	x
GAPDH (DAGL-B)	NT-Males	17.8745	17.7347	17.9575	17.9717	17.9667	17.858	17.9789	18.0511	17.8506	17.8262	18.0544	18.7825	17.8862	ND	x	x
	NT-Females	18.3349	18.1559	18.0974	18.6946	19.5081	19.4557	17.409	18.1083	18.5915	19.1296	18.5761	20.0036	17.9102	18.002	x	x
	WIN-Males	18.2552	18.1052	17.689	17.6006	18.071	17.9656	18.119	18.1413	18.1327	18.0354	18.2384	18.2809	18.2799	ND	x	x
	WIN-Females	17.8791	17.9573	17.6199	18.0472	17.9835	17.9702	17.9735	17.9709	17.607	17.752	18.0125	18.0993	18.1661	17.985	x	x
MAGL	NT-Males	26.6713	26.4097	26.0792	26.5466	27.1495	27.5839	27.0845	27.3576	27.575	27.349	26.624	26.6738	27.2342	27.25	27.0158	27.1928
	NT-Females	28.368	27.623	28.094	28.372	28.365	28.622	27.981	28.28	28.532	28.379	27.0512	27.1832	27.3255	27.2624	26.7202	26.9577
	WIN-Males	26.5263	26.6035	26.7044	27.0389	26.8183	26.7963	27.2107	27.2167	27.8763	27.3618	26.83	26.834	26.6977	27.017	27.0013	27.1082
	WIN-Females	28.208	27.624	28.023	28.422	27.911	28.286	27.65	28.007	28.436	27.724	28.4683	28.4096	27.0273	ND	26.2526	27.6334
GAPDH (MAGL)	NT-Males	18.1854	18.6847	18.3237	18.3456	18.3744	18.5284	18.3851	18.3898	ND	18.0337	18.2744	18.3417	17.8884	17.7296	17.5794	17.8576
	NT-Females	19.415	18.676	20.049	18.662	18.705	19.503	18.695	20.128	18.682	18.69	18.2161	18.3354	18.535	18.5193	17.8374	17.8901
	WIN-Males	18.5198	18.057	17.7878	17.8081	17.6236	17.6696	18.2342	18.2948	18.1823	18.3714	18.2714	18.2869	17.9805	18.0642	17.9963	18.0852
	WIN-Females	18.679	18.698	18.403	18.576	18.252	18.603	18.681	18.396	18.388	18.371	19.751	19.6981	18.165	18.2506	18.0469	17.9417
FAAH	NT-Males	29.0172	29.0561	28.6621	28.7983	28.8847	29.0138	29.1705	29.0024	29.0697	29.3197	29.0975	29.0207	28.8606	28.8179	29.2187	29.1905
	NT-Females	30.2543	30.0204	30.3077	30.2133	31.5524	31.5177	29.7588	29.7592	30.3512	30.2354	29.96	30.0063	28.9297	28.9771	29.68	29.5088
	WIN-Males	28.6414	28.7413	28.7086	28.7134	28.6145	28.5889	29.1676	29.1131	28.827	28.8112	29.2331	29.136	28.6917	28.775	29.6506	29.6897
	WIN-Females	30.3052	30.3157	29.5693	29.756	30.1186	29.9862	29.9908	30.0314	29.5748	29.7481	29.1425	29.1849	29.0338	28.9324	31.4642	31.5068
GAPDH (FAAH)	NT-Males	18.1854	18.6847	18.3237	18.3456	18.3744	18.5284	18.3851	18.3898	ND	18.0337	17.7085	17.905	17.6882	17.5442	18.2744	18.3417
	NT-Females	18.339	18.2534	18.3606	18.4505	19.4617	19.541	17.476	17.5353	18.7343	18.5929	18.725	18.6654	17.9139	17.7567	18.2161	18.3354
	WIN-Males	18.5198	18.057	17.7878	17.8081	17.6236	17.6696	18.2342	18.2948	18.1823	18.3714	18.0528	18.1079	17.8389	17.9687	18.2714	18.2869
	WIN-Females	17.9699	17.918	17.9088	17.7962	18.0308	17.8375	17.9389	17.878	17.7844	17.6254	ND	19.0457	17.9677	17.9643	19.751	19.6981
NAPE-PLD	NT-Males	36.455	36.6384	37.0354	36.5128	36.8281	37.1137	36.6597	36.7755	36.508	36.6488	37.6025	37.4566	37.4119	37.0479	x	x
	NT-Females	36.4919	36.7461	36.5174	35.6445	37.0986	36.9738	35.7269	35.9623	36.9201	36.4461	38.3421	37.6217	35.8032	36.7319	x	x
	WIN-Males	37.4406	37.064	36.6518	36.2841	37.3492	36.992	36.5415	36.5767	36.0778	35.6013	37.9287	37.7202	36.9964	37.0441	x	x
	WIN-Females	36.7128	35.5507	35.4291	35.5768	35.5433	35.6382	37.1308	36.4597	35.934	35.0661	36.5142	36.6222	36.6628	36.4964	x	x
GAPDH (NAPE-PLD)	NT-Males	17.8745	17.7347	17.9575	17.9717	17.9667	17.858	17.9789	18.0511	17.8506	17.8262	18.0544	18.7825	17.8862	ND	x	x
	NT-Females	18.3349	18.1559	18.0974	18.6946	19.5081	19.4557	17.409	18.1083	18.5915	19.1296	18.5761	20.0036	17.9102	18.002	x	x
	WIN-Males	18.2552	18.1052	17.689	17.6006	18.071	17.9656	18.119	18.1413	18.1327	18.0354	18.2384	18.2809	18.2799	ND	x	x
	WIN-Females	17.8791	17.9573	17.6199	18.0472	17.9835	17.9702	17.9735	17.9709	17.607	17.752	18.0125	18.0993	18.1661	17.985	x	x
TRVP1	NT-Males	33.6115	34.0959	33.5118	33.9877	33.6626	33.7097	33.6713	33.3336	34.1301	34.2703	33.2164	33.3272	32.7236	32.836	32.5669	32.6673
	NT-Females	33.3779	33.627	33.4813	33.5793	33.8971	33.8666	33.6156	33.6154	34.238	34.4649	32.9409	33.0048	32.5004	32.7936	31.8805	32.0267
	WIN-Males	33.3858	33.4945	33.511	33.6898	34.1082	34.1521	34.3714	34.3507	33.5481	33.6713	32.9057	32.7608	32.9163	32.7431	32.4604	32.1953
	WIN-Females	34.4152	34.8753	33.2965	33.3752	34.0747	34.3725	34.1953	34.4107	34.3921	34.6932	34.2427	33.8042	32.5201	32.9583	32.4941	32.3637
GAPDH (TRVP1)	NT-Males	17.8142	17.8517	17.9902	18.1435	17.9528	17.8345	17.9465	17.9811	17.7809	17.7907	18.2744	18.3417	17.8884	17.7296	17.5794	17.8576
	NT-Females	18.2152	18.2493	18.2366	18.1113	19.2503	19.4249	17.341	17.5544	18.6042	18.6789	18.2161	18.3354	18.535	18.5193	17.8374	17.8901
	WIN-Males	18.1021	18.0554	17.6041	17.7427	17.8948	17.9591	18.2861	17.9601	18.0029	17.9913	18.2714	18.2869	17.9805	18.0642	17.9963	18.0852
	WIN-Females	17.9925	18.2409	17.5474	17.8665	17.9944	18.0179	17.8039	17.9863	17.7593	17.8362	19.751	19.6981	18.165	18.2506	18.0469	17.9417
mGluR5	NT-Males	26.9051	27.0625	27.8112	27.7346	27.3331	27.434	27.399	27.5106	27.2851	27.205	27.5662	27.5008	27.5211	27.496	27.4864	27.622
	NT-Females	27.6836	27.7416	27.8238	27.7236	28.6677	28.6037	26.672	26.864	27.5265	27.3181	28.0222	28.129	27.0924	27.1534	26.911	27.0194
	WIN-Males	28.0425	27.9532	27.6566	27.6488	27.8416	27.7685	28.1746	28.1497	26.8616	26.9629	28.0824	28.2263	27.6393	27.58	27.6685	27.9947
	WIN-Females	27.561	27.4869	27.4026	27.3141	27.6069	27.5845	27.4925	27.5701	27.4646	27.4523	27.9328	28.024	27.5065	27.5471	29.0081	29.0914
GAPDH (mGluR5)	NT-Males	18.7124	17.62	17.9665	17.9997	17.8023	17.7672	17.8088	17.872	17.5648	17.8754	17.7085	17.905	17.6882	17.5442	18.2744	18.3417
	NT-Females	18.339	18.2534	18.3606	18.4505	19.4617	19.541	17.476	17.5353	18.7343	18.5929	18.725	18.6654	17.9139	17.7567	18.2161	18.3354
	WIN-Males	ND	18.1512	17.5272	17.5488	17.6263	17.5326	17.898	17.9707	17.9001	17.8595	18.0528	18.1079	17.8389	17.9687	18.2714	18.2869
	WIN-Females	17.9699	17.918	17.9088	17.7962	18.0308	17.8375	17.9389	17.878	17.7844	17.6254	ND	19.0457	17.9677	17.9643	19.751	19.6981
mGluR1	NT-Males	26.5562	26.9178	27.1107	27.2389	26.8125	26.9305	26.6512	26.7593	26.4966	26.5551	26.8857	26.7678	26.8309	27.2115	26.922	27.048
	NT-Females	26.9309	26.9824	27.1063	26.9665	28.3597	28.3315	26.3621	26.3831	27.0011	27.2453	26.2061	26.1817	27.6796	27.5484	26.8548	26.6733
	WIN-Males	26.9623	26.7993	26.2981	26.4821	26.6545	26.6553	26.9063	27.0515	26.1358	26.2721	26.5285	26.6732	26.6526	26.9015	26.5646	26.77
	WIN-Females	26.6997	26.9236	26.15	26.3244	26.84	26.722	26.5841	26.6788	26.6836	26.8015	28.1225	27.8106	27.0206	27.1137	26.672	26.6533
GAPDH (mGluR1)	NT-Males	17.8142	17.8517	17.9902	18.1435	17.9528	17.8345	17.9465	17.9811	17.7809	17.7907	18.2744	18.3417	17.9891	18.0685	18.1544	18.2061
	NT-Females	18.2152	18.2493	18.2366	18.1113	19.2503	19.4249	17.341	17.5544	18.6042	18.6789	18.2161	18.3354	18.8487	18.7429	18.2897	18.1038
	WIN-Males	18.1021	18.0554	17.6041	17.7427	17.8948	17.9591	18.2861	17.9601	18.0029	17.9913	18.2714	18.2869	18.0299	18.1241	18.1094	18.2769
	WIN-Females	17.9925	18.2409	17.5474	17.8665	17.9944	18.0179	17.8039	17.9863	17.7593	17.8362	19.751	19.6981	18.0795	18.1034	18.2891	18.1537
CRIP1a	NT-Males	24.8636	24.7866	24.8771	24.9571	24.775	24.7452	24.5779	24.4817	24.3144	24.3045	24.6831	24.6285	24.6807	24.7268	x	x
	NT-Females	25.1975	25.2376	24.9517	24.9329	26.1385	26.1238	24.4546	24.483	24.7124	24.6061	25.2513	25.2831	24.5535	24.5839	x	x
	WIN-Males	24.5927	24.7006	24.4047	24.7097	24.0406	24.3303	25.2544	24.9825	24.9845	24.6978	24.8369	24.7783	24.755	24.8811	x	x
	WIN-Females	24.9566	24.8902	25.0315	25.0652	24.6383	24.7198	24.6207	24.6535	24.1637	24.1711	24.7167	24.6188	24.7624	24.7881	x	x
GAPDH (CRIP1a)	NT-Males	18.0203	17.9612	18.1698	18.1871	17.8912	17.8311	17.7645	17.7625	17.459	17.6783	17.9013	17.8524	17.8576	17.947	x	x
	NT-Females	18.3075	18.3507	17.9868	17.9674	19.1379	19.005	17.3971	17.38	17.7039	17.6307	18.3389	18.3385	17.7437	17.8727	x	x
	WIN-Males	17.857	17.7239	17.9995	17.6859	17.6012	17.6786	18.0857	18.1746	17.7368	17.814	17.9483	17.782	18.142	17.9974	x	x
	WIN-Females	17.9427	17.7175	18.0954	18.0718	17.6186	17.5208	17.6677	17.5282	17.2076	17.2117	17.6055	17.585	17.886	17.8207	x	x
ABHD6	NT-Males	26.7688	27.2619	27.553	27.3869	27.0579	27.1164	27.1613	27.3619	27.1898	27.1833	27.1772	27.1497	27.4268	27.3037	x	x
	NT-Females	27.1613	27.2841	27.1104	ND	28.3267	28.5558	26.9177	26.9904	27.7488	27.6651	27.7568	27.8469	27.1101	27.1503	x	x
	WIN-Males	27.7607	27.6347	27.1767	27.3501	27.3938	27.5102	27.7265	27.7952	27.0983	27.1547	27.2571	27.2491	27.2201	27.155	x	x
	WIN-Females	26.9018	27.1274	26.6812	26.5521	27.2227	27.2159	27.3537	27.2886	27.0207	27.1297	27.1199	27.2859	27.0114	26.8543	x	x
GAPDH (ABHD6)	NT-Males	17.8142	17.8517	17.9902	18.1435	17.9528	17.8345	17.9465	17.9811	17.7809	17.7907	17.9891	18.0685	18.1544	18.2061	x	x
	NT-Females	18.2152	18.2493	18.2366	18.1113	19.2503	19.4249	17.341	17.5544	18.6042	18.6789	18.8487	18.7429	18.2897	18.1038	x	x
	WIN-Males	18.1021	18.0554	17.6041	17.7427	17.8948	17.9591	18.2861	17.9601	18.0029	17.9913	18.0299	18.1241	18.1094	18.2769	x	x
	WIN-Females	17.9925	18.2409	17.5474	17.8665	17.9944	18.0179	17.8039	17.9863	17.7593	17.8362	18.0795	18.1034	18.2891	18.1537	x	x
