# Supplementary material for: Sex-dependent effects of in utero cannabinoid exposure on cortical function
Source: eLife journal article supplement (doi:10.7554/elife.36234), 2018-09-10
Supplement: supp [file elife_poa_e36234_Figure_9_source_data_1.xlsx]

## Sheet: Feuil1
			Figure 9A			LTD WIN Male per min						LTD WIN CDPPB per min
					Time (min)	Mean	SEM	N			Time (min)	Mean	SEM	N
					-10	101.259	0.411975	17			-10	98.127	1.0946	4
					-9	99.5466	0.712632	17			-9	98.0698	1.18162	4
					-8	99.6999	0.656627	17			-8	102.733	1.56189	4
					-7	98.9998	0.848911	17			-7	100.072	0.796036	4
					-6	98.4611	0.571876	17			-6	98.92	1.39997	4
					-5	100.733	0.59009	17			-5	100.046	1.00046	4
					-4	99.6319	0.771891	17			-4	102.89	1.45031	4
					-3	98.5203	0.990341	17			-3	100.481	1.16187	4
					-2	101.601	0.492214	17			-2	98.6323	1.38998	4
					-1	101.548	0.633492	17			-1	100.028	0.162936	4
					0	63.425	4.80765	17			0	47.7374	5.39137	4
					1	65.4383	4.47755	17			1	46.8883	5.68799	4
					2	63.5533	4.16804	17			2	40.0258	5.74857	4
					3	63.7067	4.22378	17			3	38.844	3.28971	4
					4	64.5849	4.28246	17			4	44.2125	3.25747	4
					5	68.2091	4.15746	17			5	45.7468	2.79591	4
					6	70.7307	4.10991	17			6	49.5366	2.36044	4
					7	72.6569	3.70585	17			7	52.9405	2.79866	4
					8	75.1757	3.74433	17			8	53.7804	4.18488	4
					9	78.7224	3.57958	17			9	57.0387	4.05535	4
					10	80.2048	3.77086	17			10	57.9601	4.71878	4
					11	82.0743	3.34108	17			11	59.5943	4.81892	4
					12	83.3742	3.207	17			12	63.6451	5.44804	4
					13	84.0188	2.92576	17			13	62.8337	4.91067	4
					14	84.5008	2.75898	17			14	64.4569	4.40777	4
					15	85.1383	2.72316	17			15	66.2644	4.51501	4
					16	87.6888	2.78036	17			16	66.2374	5.23257	4
					17	87.4561	2.50092	17			17	63.723	4.89139	4
					18	87.2203	2.66341	17			18	67.026	5.7124	4
					19	89.4516	2.95905	17			19	67.1585	6.5867	4
					20	91.4955	2.94605	17			20	67.4637	7.75043	4
					21	89.8989	3.02749	17			21	69.9904	8.61222	4
					22	91.5005	2.55274	17			22	69.0336	7.79111	4
					23	93.2406	3.09925	17			23	69.2807	9.1842	4
					24	92.8042	2.61938	17			24	68.128	7.61645	4
					25	92.8164	2.5447	17			25	70.703	7.91129	4
					26	93.6893	2.46584	17			26	70.2969	6.79612	4
					27	95.2156	2.49144	17			27	73.6959	7.521	4
					28	93.0768	2.85163	17			28	71.4582	6.71903	4
					29	94.2747	2.63464	17			29	72.7845	6.41075	4
					30	94.2294	2.54276	17			30	73.379	5.96535	4
					31	94.3899	2.77652	17			31	73.1462	6.55182	4
					32	96.3055	2.5796	17			32	75.4398	7.88015	4
					33	93.865	2.9933	17			33	73.8849	7.56402	4
					34	93.9618	2.61957	17			34	73.7301	7.85925	4
					35	95.9053	2.74013	17			35	73.93	7.87074	4
					36	96.6874	3.0365	17			36	74.1031	8.1752	4
					37	96.0199	2.81086	17			37	75.9667	7.49695	4
					38	96.0692	2.76409	17			38	74.1197	7.04171	4
					39	97.1338	2.76287	17			39	74.7299	7.88737	4
					40	96.7836	3.09503	17			40	76.1144	7.93218	4
						Pre-Post WIN Male						Pre-Post WIN CDPPB Male
						Mean	SEM	N				Mean	SEM	N
			Figure 9B		Baseline	0.197194	0.00773912	17			Baseline	0.19005	0.00427366	4
					LTD	0.188694	0.00924151	17			LTD	0.146675	0.0116871	4
							LTD WIN CDPPB SR Male per min						LTD WIN CDPPB CPZ Male per min
			Figure 9C		Time (min)	Mean	SEM	N			Time (min)	Mean	SEM	N
					-10	97.5818	1.53603	5			-10	100.621	1.75061	3
					-9	98.7887	1.32724	5			-9	98.0694	1.12423	3
					-8	98.1495	0.447268	5			-8	98.5786	1.12774	3
					-7	98.8683	0.843234	5			-7	100.301	0.931637	3
					-6	98.5801	0.954645	5			-6	102.312	1.6894	3
					-5	99.0992	1.76843	5			-5	99.9923	1.17066	3
					-4	98.2022	1.14984	5			-4	101.171	0.682351	3
					-3	103.348	1.73924	5			-3	100.067	1.23286	3
					-2	103.815	1.17076	5			-2	100.225	1.27071	3
					-1	103.567	1.75371	5			-1	98.6624	1.84746	3
					0	43.6202	4.84984	5			0	47.4094	4.37532	3
					1	53.0549	4.40503	5			1	59.4306	2.31158	3
					2	55.4806	4.12454	5			2	58.9442	4.16107	3
					3	55.9348	3.59568	5			3	60.9669	3.8311	3
					4	60.0098	4.34008	5			4	64.0678	4.52591	3
					5	63.7712	4.73285	5			5	70.0502	6.08542	3
					6	67.5169	4.78968	5			6	70.6192	4.33756	3
					7	71.8223	4.4422	5			7	76.0008	4.89729	3
					8	76.9213	4.89056	5			8	77.6569	1.40721	3
					9	76.5351	4.76976	5			9	80.4458	0.755498	3
					10	79.9204	5.93303	5			10	83.0803	2.00772	3
					11	84.5924	4.1693	5			11	86.1045	2.16168	3
					12	86.5569	4.30992	5			12	86.856	3.48912	3
					13	87.3418	4.9258	5			13	90.4688	1.71208	3
					14	89.4089	4.77026	5			14	93.0181	2.35621	3
					15	92.0645	4.96224	5			15	91.695	1.96684	3
					16	92.243	4.57678	5			16	90.4372	0.641989	3
					17	94.1759	6.12272	5			17	90.4974	0.995251	3
					18	91.5611	5.30225	5			18	93.3466	1.61187	3
					19	95.2747	7.7906	5			19	95.1979	0.531957	3
					20	98.4154	6.45779	5			20	95.1243	1.2437	3
					21	97.7544	5.69883	5			21	93.242	2.06749	3
					22	99.4005	6.35679	5			22	96.2558	3.24598	3
					23	100.705	6.01567	5			23	97.4382	0.0441257	3
					24	100.682	6.60064	5			24	99.8349	0.93692	3
					25	102.459	7.98911	5			25	98.5602	1.59812	3
					26	101.349	8.23776	5			26	99.5634	1.02883	3
					27	103.892	8.33974	5			27	99.3208	0.808981	3
					28	104.32	7.40897	5			28	97.5828	1.85759	3
					29	103.7	6.91878	5			29	98.6463	3.63443	3
					30	107.439	6.43185	5			30	97.8299	3.45433	3
					31	106.11	5.83116	5			31	98.6436	3.6349	3
					32	107.486	7.47118	5			32	98.7341	1.8458	3
					33	108.724	9.35087	5			33	100.025	1.49884	3
					34	107.536	8.18832	5			34	96.6645	2.37478	3
					35	107.206	8.38313	5			35	99.8786	3.65701	3
					36	108.385	7.85872	5			36	99.6991	2.34098	3
					37	108.374	8.20611	5			37	97.0135	3.93469	3
					38	106.702	7.42326	5			38	100.438	2.12757	3
					39	108.362	9.66243	5			39	101.429	1.54105	3
					40	106.098	8.70634	5			40	101.8	3.08674	3
							Pre-Post WIN CDPPB SR Male						Pre-Post WIN CDPPB CPZ Male
						Mean	SEM	N				Mean	SEM	N
			Figure 9D		Baseline	0.20638	0.0185382	5			Baseline	0.219567	0.00936969	3
					LTD	0.21878	0.025808	5			LTD	0.211567	0.0116791	3
		Figure 9E			VEH		CDPPB			Figure 9F			VEH		CDPPB
		Tot interaction (#/session)			SHAM	WIN	SHAM	WIN		Tot interaction time (s)			SHAM	WIN	SHAM	WIN
					224	164	241	192					252.94	185.94	268.51	209.74
					164	149	197	233					190.51	179.67	216.3	241.03
					239	137	179	250					228.13	155.53	199.35	267.67
					179	174	201	191					195.84	186.57	225.54	211.54
					237	197	241	203					253.8	207.62	258.63	223.53
					227	186	257	176					248.75	196.59	274.81	195.18
		Figure 9G			WIN		WIN			Figure 9H			WIN		WIN
		Tot interaction (#/session)			VEH-VEH	CDPPB-VEH	CDPPB-SR	CDPPB-CPZ		Tot interaction time (s)			VEH-VEH	CDPPB-VEH	CDPPB-SR	CDPPB-CPZ
					177	229	194	189					151.21	249.6	195.23	193
					143	188	150	159					202.65	195.23	165.82	150.27
					138	195	144	142					156.64	239.65	183.21	156.77
					141	241	167	178					199.77	266.52	190.37	189.26
					156	201	190						181.51	229.27	209.67
					178	227	131						183.28	257.96	198.53
					158	197	181						177.95	225.47	200.53
					150	216	166						157.9	235.28	175.49
					141	208							199.77	234.35
					156	241							181.51	266.52
						201								229.27
						227								257.96
