# Supplementary material for: Sex-dependent effects of in utero cannabinoid exposure on cortical function
Source: eLife journal article supplement (doi:10.7554/elife.36234), 2018-09-10
Supplement: supp [file elife_poa_e36234_Figure_12_source_data_1.xlsx]

## Sheet: Feuil1
			Figure 12A			LTD WIN Male per min						LTD WIN URB597 per min
					Time (min)	Mean	SEM	N			Time (min)	Mean	SEM	N
					-10	101.259	0.411975	17			-10	99.5645	1.43577	6
					-9	99.5466	0.712632	17			-9	98.8497	1.17304	6
					-8	99.6999	0.656627	17			-8	99.4893	0.609312	6
					-7	98.9998	0.848911	17			-7	100.595	1.0631	6
					-6	98.4611	0.571876	17			-6	99.109	0.710068	6
					-5	100.733	0.59009	17			-5	101.516	1.12787	6
					-4	99.6319	0.771891	17			-4	100.462	1.24057	6
					-3	98.5203	0.990341	17			-3	97.9639	1.37523	6
					-2	101.601	0.492214	17			-2	101.363	1.64419	6
					-1	101.548	0.633492	17			-1	101.087	1.82175	6
					0	63.425	4.80765	17			0	48.7817	2.47571	6
					1	65.4383	4.47755	17			1	48.107	3.74441	6
					2	63.5533	4.16804	17			2	48.3895	4.12716	6
					3	63.7067	4.22378	17			3	51.4554	5.36887	6
					4	64.5849	4.28246	17			4	53.6715	5.44596	6
					5	68.2091	4.15746	17			5	57.0845	5.18416	6
					6	70.7307	4.10991	17			6	58.74	5.94328	6
					7	72.6569	3.70585	17			7	60.0748	5.84361	6
					8	75.1757	3.74433	17			8	61.1817	5.30856	6
					9	78.7224	3.57958	17			9	65.2767	6.48369	6
					10	80.2048	3.77086	17			10	65.0621	5.71702	6
					11	82.0743	3.34108	17			11	65.7441	4.77427	6
					12	83.3742	3.207	17			12	67.9089	4.52665	6
					13	84.0188	2.92576	17			13	70.3742	4.30754	6
					14	84.5008	2.75898	17			14	71.5667	4.76553	6
					15	85.1383	2.72316	17			15	72.3785	4.95233	6
					16	87.6888	2.78036	17			16	72.2309	3.83646	6
					17	87.4561	2.50092	17			17	72.043	4.07268	6
					18	87.2203	2.66341	17			18	75.5928	4.43876	6
					19	89.4516	2.95905	17			19	73.5472	3.46612	6
					20	91.4955	2.94605	17			20	75.9689	4.8963	6
					21	89.8989	3.02749	17			21	75.0863	4.01695	6
					22	91.5005	2.55274	17			22	77.2233	4.23805	6
					23	93.2406	3.09925	17			23	78.5432	4.24291	6
					24	92.8042	2.61938	17			24	77.7203	4.17232	6
					25	92.8164	2.5447	17			25	77.7278	3.63119	6
					26	93.6893	2.46584	17			26	78.7394	3.28305	6
					27	95.2156	2.49144	17			27	76.9537	4.08126	6
					28	93.0768	2.85163	17			28	75.3225	4.91789	6
					29	94.2747	2.63464	17			29	77.1923	4.44969	6
					30	94.2294	2.54276	17			30	76.1858	3.28656	6
					31	94.3899	2.77652	17			31	78.1535	5.07539	6
					32	96.3055	2.5796	17			32	80.6805	4.62261	6
					33	93.865	2.9933	17			33	79.5477	4.63406	6
					34	93.9618	2.61957	17			34	80.5957	4.24674	6
					35	95.9053	2.74013	17			35	79.4587	4.45216	6
					36	96.6874	3.0365	17			36	82.4329	4.46887	6
					37	96.0199	2.81086	17			37	82.2174	5.25633	6
					38	96.0692	2.76409	17			38	82.5322	4.86012	6
					39	97.1338	2.76287	17			39	81.496	4.24436	6
					40	96.7836	3.09503	17			40	81.323	4.19393	6
						Pre-Post WIN Male						Pre-Post WIN URB597 Male
						Mean	SEM	N				Mean	SEM	N
			Figure 12B		Baseline	0.197194	0.00773912	17			Baseline	0.20685	0.0169609	6
					LTD	0.188694	0.00924151	17			LTD	0.165383	0.00675897	6
							LTD WIN URB SR Male per min						LTD WIN URB CPZ Male per min
			Figure 12C		Time (min)	Mean	SEM	N			Time (min)	Mean	SEM	N
					-10	96.5453	1.03999	8			-10	99.2431	2.40944	3
					-9	98.8559	2.20454	8			-9	101.195	0.342113	3
					-8	99.2355	0.655729	8			-8	100.521	2.30197	3
					-7	98.8456	0.516061	8			-7	100.653	1.71358	3
					-6	97.5771	0.57649	8			-6	100.455	1.7189	3
					-5	100.059	1.71535	8			-5	103.112	2.1845	3
					-4	101.947	1.24075	8			-4	100.963	2.22336	3
					-3	103.887	1.30561	8			-3	95.1762	0.484977	3
					-2	101.02	1.07943	8			-2	98.4544	1.96931	3
					-1	102.027	1.38405	8			-1	100.227	1.31065	3
					0	65.2596	11.8843	8			0	53.0953	10.2961	3
					1	61.8957	8.38499	8			1	51.1609	9.03806	3
					2	58.6369	5.55201	8			2	54.859	5.33743	3
					3	58.5043	5.13859	8			3	55.7897	5.5972	3
					4	62.233	5.80373	8			4	58.0362	1.73459	3
					5	64.89	5.01954	8			5	62.2747	3.76796	3
					6	68.7129	7.0388	8			6	65.602	4.46004	3
					7	73.3869	6.06155	8			7	61.7814	3.03855	3
					8	72.4269	5.41253	8			8	62.6577	2.38438	3
					9	75.6387	5.36721	8			9	66.4193	1.01252	3
					10	80.4931	5.14647	8			10	69.7578	2.33142	3
					11	78.228	5.47517	8			11	71.8133	4.68849	3
					12	82.614	5.90716	8			12	73.4107	3.88046	3
					13	83.563	5.02021	8			13	76.9529	4.81052	3
					14	83.735	5.56458	8			14	76.3613	6.3129	3
					15	87.1256	5.54435	8			15	71.9527	4.04318	3
					16	86.9929	5.10031	8			16	77.4792	4.91084	3
					17	87.1102	4.66639	8			17	75.1826	3.32165	3
					18	89.3675	4.73908	8			18	76.1976	3.19809	3
					19	88.9044	4.9279	8			19	78.6557	4.06368	3
					20	89.5399	4.62412	8			20	77.4386	4.44442	2
					21	93.0506	4.76274	8			21	71.8407	4.81505	3
					22	90.3918	4.37372	8			22	71.8456	1.67488	3
					23	92.581	4.66149	8			23	74.3309	1.47462	3
					24	93.3489	4.03568	8			24	75.1553	1.67215	3
					25	92.8477	4.94358	8			25	74.9211	1.79897	3
					26	95.6771	4.70337	8			26	79.8352	2.23263	3
					27	92.7366	4.35989	8			27	78.9799	2.60588	3
					28	91.669	3.60301	8			28	76.051	0.730523	3
					29	94.0997	3.79205	8			29	75.6231	1.03465	3
					30	94.4142	3.97515	8			30	74.9176	3.04564	3
					31	94.4996	4.44705	8			31	78.797	3.68246	3
					32	95.4624	3.99687	8			32	79.1744	3.62175	3
					33	96.9325	4.638	8			33	81.1864	0.908999	3
					34	99.5362	4.66537	8			34	79.7007	1.42387	3
					35	97.2819	5.14401	8			35	80.9941	2.51821	3
					36	98.7848	5.42876	8			36	81.378	2.52673	3
					37	100.09	5.80011	8			37	79.2239	1.42107	3
					38	99.5743	5.82115	8			38	80.5197	5.59629	3
					39	99.5355	5.7305	8			39	77.3126	0.512695	3
					40	99.8308	5.08188	8			40	78.1759	2.53074	3
							Pre-Post WIN URB SR Male						Pre-Post WIN URB CPZ Male
						Mean	SEM	N				Mean	SEM	N
			Figure 12D		Baseline	0.221963	0.0281332	8			Baseline	0.214233	0.0416694	3
					LTD	0.2167	0.0261474	8			LTD	0.170233	0.0300865	3
		Figure 12E			VEH		URB597			Figure 12F			VEH		URB597
		Tot interaction (#/session)			SHAM	WIN	SHAM	WIN		Tot interaction time (s)			SHAM	WIN	SHAM	WIN
					199	127	211	204					222.62	157.99	255.12	219.45
					187	171	198	213					203.86	192.09	221.55	251.47
					229	154	231	193					243.44	164.37	251.85	200.28
					185	139	172	214					197.5	175.26	197.76	222.85
					217	156		185					256.78	179.63		197.68
		Figure 12G			WIN		WIN			Figure 12H			WIN		WIN
		Tot interaction (#/session)			VEH-VEH	URB-VEH	URB-SR	URB-CPZ		Tot interaction time (s)			VEH-VEH	URB-VEH	CDPPB-SR	URB-CPZ
					127	225	131	205					208.47	269.97	189.76	228.37
					171	198	134	223					176.85	226.78	170.69	252.2
					154	204	190	185					188.38	216.08	191.13	204.02
					139	236	123	225					165.04	239.64	128.2	251.17
					156	205	173	235					219.02	230.57	181.51	249.04
					138	219	132	196					189.47	239.78	140.15	202.03
					106	172	177	239					191.43	227.73	192.03	242.08
					141	168							185.58	183.74
					127	222							171.51	244.26
					157	178							178.71	196.83
					172	169							182.36	221
						237								240.58
						188								230.51
